# Supplementary material for: Mitochondrial temperature homeostasis resists external metabolic stresses
Source: eLife. 2023 Dec 11;12:RP89232. doi: 10.7554/eLife.89232 (PMC10712956; doi:10.7554/eLife.89232)
Supplement: Figure 2—figure supplement 3—source data 1. [file elife-89232-fig2-figsupp3-data1.xlsx]

## Sheet: Fig. 2 suppl. 3B
SOURCE DATA FOR
Fig. 2 – figure supplement 3B
MTY calibration in PBS only
Temp (degC)		% initial fluorescence
								mean	SD
37		28.79	29.37	31.25	26.74	30.07	37	29.244	1.67319
40		25.73	25.56	27.73	24.22	26.94	40	26.036	1.35138
43		23.04	21.92	25.42	22.49	24.18	43	23.41	1.39968
46		19.62	19.91	23.56	20.69	21.52	46	21.06	1.58071
49		17.26	18.04	21.3	18.57	19.52	49	18.938	1.55526
52		15.19	15.51	19.49	17.68	17.39	52	17.052	1.75337
55		13.36	13.85	18.01	16.35	15.57	55	15.428	1.89101
58		11.74	12.62	16.08	15.26	13.88	58	13.916	1.79618
61		10.34	11.24	14.75	14.36	12.86	61	12.71	1.91601
64		9.66	10.26	12.99	12.89	11.59	64	11.478	1.50674
