# Supplementary material for: Mitochondrial temperature homeostasis resists external metabolic stresses
Source: eLife. 2023 Dec 11;12:RP89232. doi: 10.7554/eLife.89232 (PMC10712956; doi:10.7554/eLife.89232)
Supplement: Figure 2—figure supplement 5—source data 1. [file elife-89232-fig2-figsupp5-data1.xlsx]

## Sheet: Fig. 2 suppl. 5C
SOURCE DATA FOR
Fig. 2 – figure supplement 5C
		lo glc media	lo glc + gal	normal glc	normal glc
				iMEF(P)	iMEF(L7)
				from Fig. 2D	from Fig. 2C
	iMEF P		12.14	11.65	10.78
	iMEF P		10.83	6.72	8.14
	iMEF P	8.77		8.77	10.56
	iMEF P	11.78		11.78	9.89
	iMEF(L7)	10.78		12.14	8.96
				10.82
