# Supplementary material for: Mitochondrial temperature homeostasis resists external metabolic stresses
Source: eLife. 2023 Dec 11;12:RP89232. doi: 10.7554/eLife.89232 (PMC10712956; doi:10.7554/eLife.89232)
Supplement: Figure 2—source data 1. [file elife-89232-fig2-data1.xlsx]

## Sheet: Fig. 2A
SOURCE DATA FOR
Fig. 2A
HEK293T cells
	rotenone	antimycin	KCN	oligomycin
	14.14	15.98	14.36	18.21
	15.23	16.78	17.42	19.08
	12.85	15.05	17.93	18.76
	14.9	15.17	15.94	19.2
	14.99			18.16
	13.97	17.04	18.03
mean	14.3467	16.004	16.736	18.682
SD	0.885995	0.905776	1.56899	0.481685
One-way ANOVA + Tukey HSD
https://www.socscistatistics.com
Rot-Ant	ns
Rot-KCN	**
Rot-Oli	***
Ant-KCN	ns
Ant-Oli	**
KCN-Oli	*
