# Supplementary material for: Mitochondrial temperature homeostasis resists external metabolic stresses
Source: eLife. 2023 Dec 11;12:RP89232. doi: 10.7554/eLife.89232 (PMC10712956; doi:10.7554/eLife.89232)
Supplement: Figure 2—source data 2. [file elife-89232-fig2-data2.xlsx]

## Sheet: Fig. 2B
SOURCE DATA FOR
Fig. 2B
U2OS cells
	rotenone	antimycin	KCN	oligomycin
	12.39	15.2	17.71	18.39
	11.9	16.55	17.77	19.61
	9.15	16.68	17.46	19.73
	10.49	15	13.18	18.29
	14.74	14.15
	11.89		15.08	18.47
mean	11.76	15.516	16.24	18.898
SD	1.88355	1.0789	2.04324	0.708886
One-way ANOVA + Tukey HSD
https://www.socscistatistics.com
Rot-Ant	**
Rot-KCN	**
Rot-Oli	***
Ant-KCN	ns
Ant-Oli	*
KCN-Oli	ns
