# Supplementary material for: Mitochondrial temperature homeostasis resists external metabolic stresses
Source: eLife. 2023 Dec 11;12:RP89232. doi: 10.7554/eLife.89232 (PMC10712956; doi:10.7554/eLife.89232)
Supplement: Figure 2—source data 3. [file elife-89232-fig2-data3.xlsx]

## Sheet: Fig. 2C
SOURCE DATA FOR
Fig. 2C
iMEF(L7) cells
	rotenone	antimycin	KCN	oligomycin
	10.78	8.48	12.04	16.85
	8.14	11.21	14.44	17.21
	10.56	9.84	15.55	18.53
	9.89	11.36	14.86	15.96
	8.96	12.45	15.32	17.04
mean	9.666	10.668	14.442	17.118
SD	1.10877	1.53469	1.40916	0.924808
One-way ANOVA + Tukey HSD
https://www.socscistatistics.com
Rot-Ant	ns
Rot-KCN	***
Rot-Oli	***
Ant-KCN	**
Ant-Oli	***
KCN-Oli	*
