# Supplementary material for: Mitochondrial temperature homeostasis resists external metabolic stresses
Source: eLife. 2023 Dec 11;12:RP89232. doi: 10.7554/eLife.89232 (PMC10712956; doi:10.7554/eLife.89232)
Supplement: Figure 2—source data 4. [file elife-89232-fig2-data4.xlsx]

## Sheet: Fig. 2D
SOURCE DATA FOR
Fig. 2D
iMEF(P) cells
		rotenone	antimycin	rot+ant	KCN	oligomycin
		11.65	5.58	10.84	13.14	17.97
		6.72	9.84	8.27	14.94	18.74
		8.77	8.71	9.6	13.07	17.52
		11.78	12.08	10.6	13.64	17.69
		12.14	10.52	9.48	12.01	16.87
		10.82
mean		10.3133	9.346	9.758	13.36	17.758
SD		2.13659	2.43333	1.02422	1.06417	0.68174
One-way ANOVA + Tukey HSD
www.statskingdom.com
Rot-KCN	*
Rot-Oli	***
Ant-KCN	**
Ant-Oli	***
R+A-KCN	*
R+A-oli	***
KCN-Oli	**
