# Supplementary material for: Mitochondrial temperature homeostasis resists external metabolic stresses
Source: eLife. 2023 Dec 11;12:RP89232. doi: 10.7554/eLife.89232 (PMC10712956; doi:10.7554/eLife.89232)
Supplement: Figure 2—source data 5. [file elife-89232-fig2-data5.xlsx]

## Sheet: Fig. 2E
SOURCE DATA FOR
Fig. 2E
S2 cells
	rotenone	antimycin	KCN	oligomycin
	8.45	15.23	14.73	19.42
	16.1	9.46	17.35	18.75
	8.82	8.5	15.28	18.08
	9.6	14.2	19.5	19.1
	11.79	16.1	19.6	18.68
	12.83	12.31	18.8	20.57
			17.58
mean	11.265	12.6333	17.5433	19.1
SD	2.92495	3.11365	2.13132	0.848834
One-way ANOVA + Tukey HSD
https://www.socscistatistics.com
Rot-Ant	ns
Rot-KCN	***
Rot-Oli	***
Ant-KCN	**
Ant-Oli	***
KCN-Oli	ns
