# Supplementary material for: Mitochondrial temperature homeostasis resists external metabolic stresses
Source: eLife. 2023 Dec 11;12:RP89232. doi: 10.7554/eLife.89232 (PMC10712956; doi:10.7554/eLife.89232)
Supplement: Figure 3—source data 1. [file elife-89232-fig3-data1.xlsx]

## Sheet: Fig. 3D
SOURCE DATA FOR
Fig. 3D
Mito-gTEMP calibration curve
Temperature	Sirius/mT-sapphire ratio
	mean	SD		actual numbers
30	8.38	0.15		8.35	8.42	8.32	8.32	8.3	8.15	8.4	8.42	8.7
33	8.56	0.11		8.43	8.58	8.61	8.63	8.5	8.37	8.53	8.64	8.74
36	8.75	0.12		8.59	8.85	8.81	8.89	8.61	8.59	8.75	8.77	8.81
39	8.92	0.07		8.77	9.03	8.99	8.94	8.9	8.91	8.9	8.91	8.95
42	9.11	0.13		8.89	9.25	9.15	9.15	9.01	9	9.13	9.28	9.12
extrapolated function y = 0.609x + 6.550
r[exp]2=0.9998
