# Supplementary material for: Mitochondrial temperature homeostasis resists external metabolic stresses
Source: eLife. 2023 Dec 11;12:RP89232. doi: 10.7554/eLife.89232 (PMC10712956; doi:10.7554/eLife.89232)
Supplement: Figure 3—source data 2. [file elife-89232-fig3-data2.xlsx]

## Sheet: Fig. 3E
SOURCE DATA FOR
Fig. 3E
MTY v. Mito-gTEMP
		MTY from Fig. 2		Mito-gTEMP			for stats		MTY	Mito-gTEMP		TTEST
		mean	SD*2	mean	SD*2
oligomycin treatment								HEK293T	18.21	20.13		0.290207
HEK293T		18.68	1.78	17.6925	3.77858				19.08	18.14
U2OS		18.9	1.42	15.31	5.44459				18.76	16.7
iMEF(P)		17.76	1.36	15.862	2.13927				19.2	15.8
									18.16
rotenone treatment
iMEF(P) rotenone		10.31	4.27	8.94	2.11603
								U2OS	18.39	13		0.0214119
									19.61	11.84		*
									19.73	17.39
									18.29	16.42
									18.47	17.9
								iMEF(P)
									17.97	16.26		0.0101945
									18.74	14.73		*
									17.52	15.88
									17.69	17.42
									16.87	15.02
								iMEF(P)
								rotenone
									11.65	9.6		0.225204
									6.72	9.46
									8.77	8.78
									11.78	9.7
									12.14	7.16
									10.82
