# Supplementary material for: Mitochondrial temperature homeostasis resists external metabolic stresses
Source: eLife. 2023 Dec 11;12:RP89232. doi: 10.7554/eLife.89232 (PMC10712956; doi:10.7554/eLife.89232)
Supplement: Figure 5—source data 1. [file elife-89232-fig5-data1.xlsx]

## Sheet: Fig. 5B
SOURCE DATA FOR
Fig. 5B
Effect of media supplementation
	mean	SD			actual data
Initial (5-10 min)										'TREATMENT GROUP’ FOR STATS
PBS	53.94	1.10815			52.3	53.8	54.2	55.4	54	A
+glc+gln	55.6	0.940744			55.6	57	55.9	54.6	54.9	B
added glc+gln	53.66	0.450555			53.1	53.8	54.3	53.4	53.7	C
Final (30-35 min)
PBS	49.96	1.15672			48.5	51.5	49.3	50.6	49.9	D
+glc+gln	52.92	1.67242			51.8	54.8	54.1	50.7	53.2	E
added glc+gln	55.4	0.905539			54.6	54.4	55.6	55.8	56.6	F
Stats from
https://astatsa.com/OneWay_Anova_with_TukeyHSD/_result/
