# Supplementary material for: Mitochondrial temperature homeostasis resists external metabolic stresses
Source: eLife. 2023 Dec 11;12:RP89232. doi: 10.7554/eLife.89232 (PMC10712956; doi:10.7554/eLife.89232)
Supplement: Figure 5—source data 2. [file elife-89232-fig5-data2.xlsx]

## Sheet: Fig. 5F
SOURCE DATA FOR
Fig. 5F
Effect of BKA
	mean	SD		actual numbers				stats from https://astatsa.com/OneWay_Anova_with_TukeyHSD
Initial (5-10 min)	53.3	2.1166		54.1	50.9	54.9
+BKA (11-17 min)	57.7667	2.02073		58.1	55.6	59.6
Final (30-35 min)	52.1667	1.58219		53.9	50.8	51.8
