# Supplementary material for: Mitochondrial temperature homeostasis resists external metabolic stresses
Source: eLife. 2023 Dec 11;12:RP89232. doi: 10.7554/eLife.89232 (PMC10712956; doi:10.7554/eLife.89232)
Supplement: Figure 6—source data 1. [file elife-89232-fig6-data1.xlsx]

## Sheet: Fig. 6B
SOURCE DATA FOR
Fig. 6B
initial cooling in iMEF(P) and iMEF(AOX) cells treated with OXPHOS inhibitors
Peak cooling (10 min post-drug)
		mean	SD	actual values
rotenone										ttest
iMEF(P)	MTY	10.3167	2.37844	11.7	6.7	8.8	11.8	12.1	10.8		from 2D
iMEF(AOX)	MTY	9.38	2.44683	9.4	12.7	9.7	9.3	5.8		ns (lines)
iMEF(AOX)	Mito-gTEMP	9.6	1.38996	10.5	8.7	11.1	7.7	10.1		ns (methods)
										ttest
antimycin
iMEF(P)	MTY	9.3	2.42755	5.6	9.8	8.7	12.1	10.5		0.008	from 2D
iMEF(AOX)	MTY	3.94	2.46536	3.2	7.6	2	1.7	5.2		**
KCN
iMEF(P)	MTY	13.4	1.05024	13.1	14.9	13.1	13.6	12		0.011	from 2D
iMEF(AOX)	MTY	8.33333	3.09273	11.3	11.2	9.3	4.2	6.5	7.5	**
oligomycin
iMEF(P)	MTY	17.8	0.661816	18	18.7	17.5	17.7	16.9		1e-08	from 2D
iMEF(AOX)	MTY	8.748	0.87928	7.92	9.05	9.26		10.05	7.46	***
