# Supplementary material for: Mitochondrial temperature homeostasis resists external metabolic stresses
Source: eLife. 2023 Dec 11;12:RP89232. doi: 10.7554/eLife.89232 (PMC10712956; doi:10.7554/eLife.89232)
Supplement: Figure 6—source data 2. [file elife-89232-fig6-data2.xlsx]

## Sheet: Fig. 6C
SOURCE DATA FOR
Fig. 6C
iMEFs treated with OXPHOS inhibitors, actual cooling at different times post drug
		deltaT, degC
		mean	SD	actual data
iMEF (AOX) MTY rotenone
10 min post drug		9.38	2.44683	9.4	12.7	9.7	9.3	5.8
20 min post drug		7.78	3.05729	7.8	11.7	9.3	6.6	3.5
35 min post drug		3.84	3.21216	4.7	8.5	4.4	0.9	0.7
47 min post drug		0.7	4.23438	2.4	5.9	2	-5.2	-1.6
60 min post drug		2.25	2.6163	0.4	4.1
71 min post drug		1.25	1.90919	-0.1	2.6
		deltaT, degC
		mean	SD	actual data
iMEF (AOX) MTY antimycin
10 min post drug		3.94	2.46536	3.2	7.6	2	1.7	5.2
20 min post drug		2.48	2.04744	1.6	4.8	1.6	0	4.4
35 min post drug		-0.84	2.85272	-2.9	-3.4	0.9	-2.1	3.3
47 min post drug		-2.56	3.77399	-4.2	-7.8	-0.3	-2.6	2.1
60 min post drug		-1.45	3.88909				-4.2	1.3
		deltaT, degC
		mean	SD	actual data
iMEF (AOX) MTY KCN
10 min post drug		8.33333	2.79619	11.3	11.2	9.3	4.2	6.5	7.5
20 min post drug		7.71667	3.09219	11	11.2	8.4	3.3	5.8	6.6
35 min post drug		5.76667	3.62969	9.7	9.5	7.1	0.7	3	4.6
47 min post drug		3.96667	4.07954	7.9	8.2	6.2	-1.3	0	2.8
60 min post drug		1.73333	3.99583	5.2	5.9	4.4	-3.9	-1.2	0
75 min post drug		1.06	3.61635	3.2	4.2	3.6		-3.5	-2.2
90 min pos drug		-0.5	3.75965	1.7	2.5	2.5		-4.8	-4.4
100 min post drug		-0.375	3.28367	1.3	1.3	1.2			-5.3
		deltaT, degC
		mean	SD	actual data
iMEF (AOX) MTY oligomycin
10 min post drug		8.748	1.04798	7.92	9.05	9.26		10.05	7.46
20 min post drug		6.958	1.55389	6.64	6.29	7.21		9.42	5.23
35 min post drug		1.604	2.15868	2.71	1.55	-0.83		4.59	0
47 min post drug		-1.5975	2.53691	-1.64	-1.21	-4.86		1.32
60 min post drug		-5.835	2.59508		-4	-7.67
