# Supplementary material for: Mitochondrial temperature homeostasis resists external metabolic stresses
Source: eLife. 2023 Dec 11;12:RP89232. doi: 10.7554/eLife.89232 (PMC10712956; doi:10.7554/eLife.89232)
Supplement: Figure 7—source data 1. [file elife-89232-fig7-data1.xlsx]

## Sheet: Fig. 7A
SOURCE DATA FOR
Fig. 7A
extrapolated temperatures after anisomycin treatment, using mito-gTEMP and calibration curve of Fig. 3D
iMEF(P) cells
Time of anisomycin treatment (h)			iMEF(P)				Statistics from https://astatsa.com/OneWay_Anova_with_TukeyHSD/
			mean	SD	actual numbers
0			52.22	2.19704	54.7
					52.7
					53.2
					48.8
					51.7
1			56.1929	1.38371	55.1
					54.9
					52.7
					54.2
					56.4
					56.3
2			56.92	1.15888	56.5
					58.2
					57.3
					55.2
					57.6
3			56.92	0.957601	57.3
					56.6
					58.4
					56
					56.3
4			55	1.43701	57
					53.6
					55.5
					55.3
					53.6
5			54.44	1.68315	55.3
					55.2
					55.6
					54.6
					51.5
6			53.66	1.86226	55.4
					54.2
					50.8
					55
					52.9
18			53.04	1.34276	53.8
					52.9
					52.9
					51
					54.6
