# Supplementary material for: Mitochondrial temperature homeostasis resists external metabolic stresses
Source: eLife. 2023 Dec 11;12:RP89232. doi: 10.7554/eLife.89232 (PMC10712956; doi:10.7554/eLife.89232)
Supplement: Figure 7—source data 2. [file elife-89232-fig7-data2.xlsx]

## Sheet: Fig. 7B
SOURCE DATA FOR
Fig. 7B
extrapolated temperatures after anisomycin treatment, using mito-gTEMP and calibration curve of Fig. 3D
iMEF(AOX) cells
Time of anisomycin treatment (h)			iMEF(AOX)
			mean	SD	actual numbers		https://astatsa.com/OneWay_Anova_with_TukeyHSD
0			52.82	1.55628	54
					51.6
					53.3
					50.8
					54.4
1			56.74	1.04307	56.6
					58
					57.6
					55.9
					55.6
2			56.2	1.11355	56.5
					56.7
					54.3
					57.2
					56.3
3			57.44	2.06712	59.2
					59.7
					54.6
					56.6
					57.1
4			61.24	5.74395	67.8
					59.5
					66.8
					55.3
					56.8
5			57.04	1.2818	56.5
					55.3
					57.4
					58.8
					57.2
6			55.98	1.92925	57.9
					54.2
					58.2
					55.2
					54.4
18			51.9	1.28258	51.1
					54.1
					51.8
					50.9
					51.6
