# Supplementary material for: Mitochondrial temperature homeostasis resists external metabolic stresses
Source: eLife. 2023 Dec 11;12:RP89232. doi: 10.7554/eLife.89232 (PMC10712956; doi:10.7554/eLife.89232)
Supplement: Figure 7—source data 3. [file elife-89232-fig7-data3.xlsx]

## Sheet: Fig. 7C
SOURCE DATA FOR
Fig. 7C
rotenone treatment of iMEF(P) and iMEF(AOX) cells after pretreatment with anisomycin
		hours of anisomycin	0		1	2	3	4	5	6	18
			from fig. 2D
iMEF(P)			11.65		7.1	6.2	6.1	2.3	4.7	4.3	1.7
			6.72		6.9	6.3	5.9	4.3	5.4	2.9	1.8
			8.77		5.9	5.7	4.9	5.4	3.3	4	1.9
			11.78		6.7	6.6	6.2	6.8	6.1	3.9	1
			12.14
			10.82
	mean		10.3133		6.65	6.2	5.775	4.7	4.875	3.775	1.6
	SD		2.13659		0.525991	0.374166	0.596518	1.89912	1.19548	0.607591	0.408248
			from Fig. 5B
		hours of anisomycin	0		1	2	3	4	5	6	18
iMEF(AOX)			9.4		10.8	10.8	8.4	2.8	7.9	7.5	6.9
			12.7		10	8.6	7.6	6.3	5.8	7.4	5.7
			9.7		10.9	9.7	8.3	5.8	7.9	4.8	4.3
			9.3		11.1	10.9	8.8	6.9	6.1	6	6.5
			5.8
mean	mean		9.38		10.7	10	8.275	5.45	6.925	6.425	5.85
2*SD	SD		2.44683		0.483046	1.08012	0.499166	1.823	1.13248	1.2816	1.14746
iMEF(P) stats					iMEF(AOX) stats
