# Supplementary material for: Mitochondrial temperature homeostasis resists external metabolic stresses
Source: eLife. 2023 Dec 11;12:RP89232. doi: 10.7554/eLife.89232 (PMC10712956; doi:10.7554/eLife.89232)
Supplement: Figure 7—source data 4. [file elife-89232-fig7-data4.xlsx]

## Sheet: Fig. 7D
SOURCE DATA FOR
Fig. 7D
oligomycin treatment of iMEF(P) and iMEF(AOX) cells after pretreatment with anisomycin (peak values)
			from 2D									from 5B
			Control iMEF(P)									AOX peak (10 min post drug)
		hours of anisomycin	0	1	2	3	4	5	6	18		0	1	2	3	4	5	6	18
												from 5B
			17.97	15	18	19	14.69	19.7	12.13	16.3		7.92	8.6	10.7	12.66	12.2	9.72	12.4	8.47
			18.74	12.8	15	18.37	14.08	19.54	15.15	14.9		9.05	11.7	9.1	7.13	15.29	10.79	12.67	8.95
			17.52	15	16.67	19.11	19.46	19.06	16.14	18.43		9.26	11.48	10.93	13.23	10.66	11.56	9.66	13.36
			17.69	16.8	15	19.13	19.58	19.45	15.16	17.87		10.05	11.7	11.82	9.79	10.55	11.71	12.56	10.96
			16.87	15.7	17.84	19.16	19.1	18.9	16.06			7.46	7.4	11.05	12.02	10.93	12.1	13.1	10.12
				16.16									7.67
	mean		17.758	15.2433	16.502	18.954	17.382	19.33	14.928	16.875		8.748	9.75833	10.72	10.966	11.926	11.176	12.078	10.372
	SD		0.68174	1.38277	1.46411	0.332009	2.75004	0.336601	1.63419	1.59575		1.04798	2.08657	0.998474	2.51019	1.99247	0.942778	1.37638	1.93501
												stats
